# Supplementary material
Source: PubMed Central journal article supplement (PMC7324089)
Supplement: mmc1.pdf [file mmc1.pdf]

# THE LANCET

## Rheumatology

### Supplementary appendix

This appendix formed part of the original submission and has been peer reviewed. We post it as supplied by the authors.

Supplement to: Brondani G, Apollonio L, Gremese E, Ferraccioli G. Pulmonary intravascular coagulopathy in COVID-19 pneumonia. *Lancet Rheumatol* 2020; published online June 29. [https://doi.org/10.1016/S2665-9913\(20\)30189-2](https://doi.org/10.1016/S2665-9913(20)30189-2).

## APPENDIX

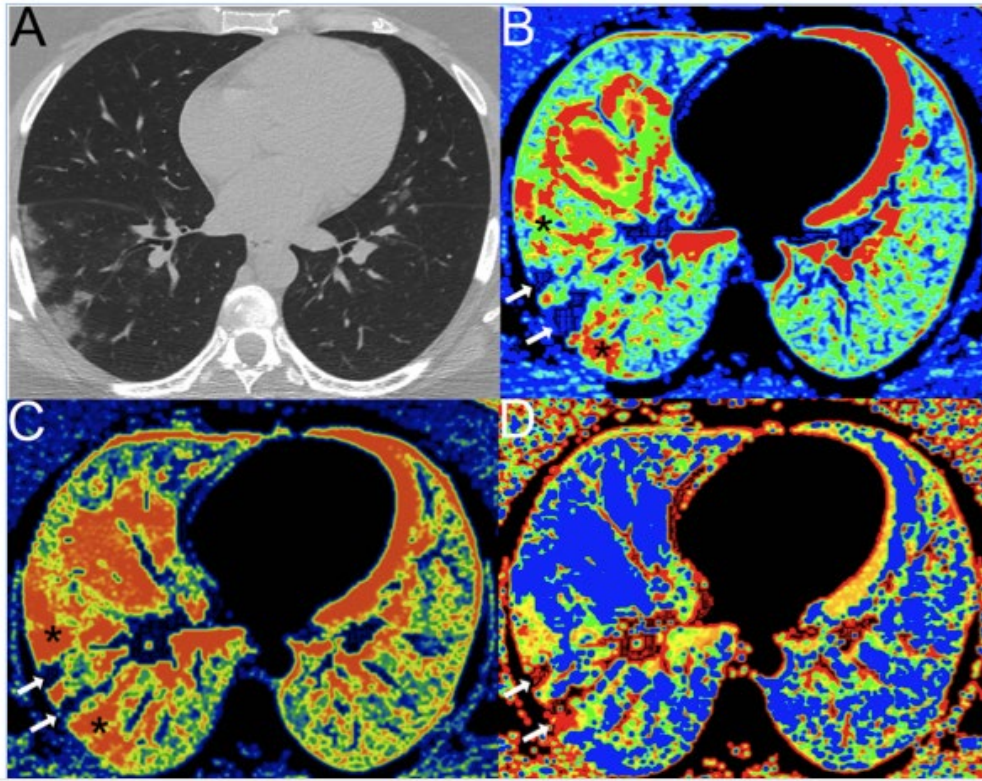

**Figure: Standard CT and CT perfusion scan done in patient with early pneumonitis reveals microangiopathy that presents as hypoperfusion of the involved parenchyma.**  
(A) Standard CT scan shows ground glass opacities. (B) Lung blood volume shows hypoperfusion in some areas of the lower lobe (white arrows). (C) Lung blood flow shows the same hypoperfused areas as (B). (D) Lung morphological perfusion study confirms hypoperfused sites.
